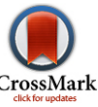

## Correction

# Correction: Blood Group Substances as Potential Therapeutic Agents for the Prevention and Treatment of Infection with Noroviruses Proving Novel Binding Patterns in Human Tissues

The *PLOS ONE* Staff

There are errors in the first paragraph of the Binding specificity of NoV to human saliva and gastric mucosa samples section of the Materials and Methods. The correct sentence is: VLPs from sixteen different NoVs used in this study were as follows (strain and sequence accession number); GI.1 (4656, EF547392), GI.3 (3634, EF547393), GI.4 (2876, EF547394), GI.8 (3006, EF547395), GI.11 (2258, EF547396), GII.1 (3101, EF547397), GII.2 (2840, EF547398), GII.3 (3229, EF547399), GII.4 (1207, DQ975270), GII.5 (3611, EF5473400), GII.6 (3612, EF547401), GII.7 (419, EF547402), GII.12 (2087, EF547403), GII.13 (3385, EF547404), GII.14 (2468, EF547405), and GII.15 (3625, EF547406).

## Reference

1. Yazawa S, Yokobori T, Ueta G, Ide M, Altan B, et al. (2014) Blood Group Substances as Potential Therapeutic Agents for the Prevention and Treatment of Infection with Noroviruses Proving Novel Binding Patterns in Human Tissues. PLoS ONE 9(2): e89071. doi:10.1371/journal.pone.0089071

**Citation:** The *PLOS ONE* Staff (2014) Correction: Blood Group Substances as Potential Therapeutic Agents for the Prevention and Treatment of Infection with Noroviruses Proving Novel Binding Patterns in Human Tissues. PLoS ONE 9(9): e107825. doi:10.1371/journal.pone.0107825

**Published:** September 3, 2014

**Copyright:** © 2014 The *PLOS ONE* Staff. This is an open-access article distributed under the terms of the Creative Commons Attribution License, which permits unrestricted use, distribution, and reproduction in any medium, provided the original author and source are credited.
